# Supplementary material
Source: HighWire-hosted journal article supplement (https://www.ajnr.org/highwire/filestream/54675/field_highwire_adjunct_files/0/17-00160.pdf)
Supplement: 17-00160.pdf [file 17-00160.pdf]

**On-line Table 1: Individual clinical and laboratory data of the 19 infants with congenital Zika syndrome (possible, probable, or confirmed) included in the study**

| No.                                                      | Sex | Mother's Rash during Pregnancy | Gestational Age (wk) | HC at Birth (cm) | Age at Exam (days) | Exam Performed | STORCH and Dengue Status <sup>a</sup> | IgM ZIKV CSF Status <sup>a</sup> | PRNT CSF Status (Infant) | PRNT Serum Status (Mother) | CZS       |
|----------------------------------------------------------|-----|--------------------------------|----------------------|------------------|--------------------|----------------|---------------------------------------|----------------------------------|--------------------------|----------------------------|-----------|
| Congenital Zika syndrome with microcephaly at birth      |     |                                |                      |                  |                    |                |                                       |                                  |                          |                            |           |
| 1                                                        | F   | No rash                        | 40                   | 30               | 157                | MRI            | Negative                              | Negative                         | No data                  | No data                    | Possible  |
| 2                                                        | F   | 2 mo                           | 38                   | 30               | 105                | MRI            | Negative                              | Positive                         | No data                  | No data                    | Confirmed |
| 3                                                        | M   | 3 mo                           | 39                   | 31               | 173                | MRI            | Negative                              | Positive                         | No data                  | No data                    | Confirmed |
| 4                                                        | F   | 2.5 mo                         | 39                   | 28.5             | 138                | MRI            | Negative                              | Positive                         | No data                  | No data                    | Confirmed |
| 5                                                        | F   | No rash                        | 37                   | 29               | 135                | MRI            | Negative                              | Positive                         | No data                  | No data                    | Confirmed |
| 6                                                        | M   | 4 mo                           | 37                   | 26               | 148                | MRI            | Negative                              | Positive                         | No data                  | No data                    | Confirmed |
| 7                                                        | M   | 3 mo                           | 39                   | 26               | 139                | MRI            | Negative                              | Positive                         | No data                  | No data                    | Confirmed |
| 8                                                        | M   | No rash                        | 40                   | 27               | 137                | MRI            | Negative                              | No data                          | No data                  | No data                    | Possible  |
| 9                                                        | M   | 3 mo                           | 39w 5d               | 28               | 123                | MRI            | Negative                              | Positive                         | No data                  | No data                    | Confirmed |
| CZS with microcephaly developed postnatally <sup>b</sup> |     |                                |                      |                  |                    |                |                                       |                                  |                          |                            |           |
| 10                                                       | F   | 3 mo                           | 38                   | 33               | 60                 | MRI            | No data                               | No data                          | No data                  | No data                    | Possible  |
| 11                                                       | F   | 2 mo                           | 35                   | 29.5             | 129                | MRI            | Negative                              | Positive                         | No data                  | No data                    | Confirmed |
| 12                                                       | M   | 4 mo                           | 36                   | 31.5             | 133                | MRI            | Negative                              | No data                          | No data                  | No data                    | Probable  |
| 13                                                       | M   | 4 mo                           | 39w 5d               | 32               | 113                | MRI            | Negative                              | No data                          | No data                  | No data                    | Probable  |
| 14                                                       | F   | 3 mo                           | 37                   | 32               | 88                 | CT             | Negative                              | Positive                         | No data                  | No data                    | Confirmed |
| 15                                                       | F   | No data                        | No data              | No data          | 381                | MRI            | Negative                              | Negative                         | Negative                 | No data                    | Possible  |
| 16                                                       | F   | No rash                        | 39w 5d               | 32               | 328                | MRI            | Negative                              | Negative                         | Negative                 | No data                    | Possible  |
| CZS without microcephaly                                 |     |                                |                      |                  |                    |                |                                       |                                  |                          |                            |           |
| 17                                                       | F   | 1 mo                           | 38                   | 33               | 253                | CT/MRI         | Negative                              | Negative                         | Negative                 | Not performed              | Probable  |
| 18                                                       | F   | 5 mo                           | 38                   | 34               | 323                | CT/MRI         | Negative                              | Negative                         | Negative                 | Positive                   | Probable  |
| 19                                                       | F   | 4 mo                           | 39                   | 34.5             | 352                | CT/MRI         | Negative                              | Negative                         | Negative                 | Positive                   | Probable  |

**Note:**—w indicates weeks; d, days; HC, head circumference.

<sup>a</sup> Test performed on the infant.

<sup>b</sup> Patients 10–14 had been considered microcephalic at birth, based on previous HC criteria; therefore, they were included in the microcephaly protocol at that time and had imaging performed earlier. However, according to the Intergrowth-21st (current criteria), they had normal HC at birth and only developed microcephaly postnatally.

**On-line Table 2: Summarized history (clinical, neuroimaging, epidemiologic, and laboratory) of the 3 infants with probable congenital Zika syndrome without microcephaly**

| No. | Clinical History and Examination                                                                                                                                                                                                                                                                                                                                                                                                                                                                                     | Brain Imaging Abnormalities                                                                                                                                                                            | History of Mother's Rash                                                                                                             | Laboratory Tests                                                                                                                                                                                                         |
|-----|----------------------------------------------------------------------------------------------------------------------------------------------------------------------------------------------------------------------------------------------------------------------------------------------------------------------------------------------------------------------------------------------------------------------------------------------------------------------------------------------------------------------|--------------------------------------------------------------------------------------------------------------------------------------------------------------------------------------------------------|--------------------------------------------------------------------------------------------------------------------------------------|--------------------------------------------------------------------------------------------------------------------------------------------------------------------------------------------------------------------------|
| 17  | No abnormal findings during pregnancy<br>HC at birth: 33 cm (z score between 0 and -1)<br><br>Reduction of movements in the left superior limb since 6 mo<br>HC (8 mo): 41 cm (z score between -1 and -2)<br>No other clinical abnormalities                                                                                                                                                                                                                                                                         | Performed at 8 mo (Fig 1)<br>MRI: cortico-subcortical white matter junction calcifications (bilateral), slight ventricle enlargement (right), bilateral polymicrogyria<br>CT: confirmed calcifications | Answered after neuroimaging evaluation<br>Mother recalled fever and rash for 2-3 days in the 1st month of pregnancy                  | Negative CSF and serologic results for STORCH and dengue<br>Negative CSF results for ZIKV-specific IgM<br>Negative CSF results for PRNT in the infant<br>No data from mother                                             |
| 18  | No abnormal findings during pregnancy (except for cardiac interventricular communication)<br>HC at birth: 34 cm (z score between 0 and 1)<br><br>Delayed neuropsychomotor development since 5 mo<br>HC (11 mo): 43 cm (z score between -1 and -2)<br><br>Physical exam (11 mo): good visual interaction and smile; limb hypertonia predominant on the right and right palmar grasp; good head control but could not sit without support<br>No other clinical abnormalities                                           | Performed at 11 mo (Fig 2)<br>MRI: cortico-subcortical white matter junction calcifications (right), slight ventricle enlargement (left), bilateral polymicrogyria<br>CT: confirmed calcifications     | Answered after neuroimaging evaluation<br>Mother recalled pruritic rash, without fever or pain for 3 days in the 5th mo of pregnancy | Negative CSF and serologic results for STORCH and dengue<br>Negative CSF results for ZIKV-specific IgM<br>Negative CSF and serologic results for PRNT in the infant<br>Positive serologic results for PRNT in the mother |
| 19  | No abnormal findings during pregnancy<br>HC at birth: 34.5 cm (z score between 0 and 1)<br><br>Delayed neuropsychomotor development since 5 mo<br>HC (12 mo): 44 cm (z score between 0 and -1)<br>Physical exam (12 mo): good visual interaction and smile; answer to simple questions; good head control and sat unsupported; asymmetric use of both hands (right hand predominant); could stand with support but could not walk; mild paresis and hypertonia of the lower limbs<br>No other clinical abnormalities | Performed at 11 mo (Fig 3)<br>MRI: cortico-subcortical white matter junction calcifications in frontal and parietal lobes (bilateral)<br>CT: confirmed calcifications                                  | Answered before neuroimaging evaluation<br>Mother recalled 24-hour rash without fever or pain in the 4th month of pregnancy          | Negative CSF and serologic results for STORCH and dengue<br>Negative CSF results for ZIKV-specific IgM<br>Negative CSF and serologic results for PRNT in the infant<br>Positive serologic results for PRNT in the mother |

**Note:**—HC indicates head circumference.
